# Supplementary material for: Response to anti-PD1 therapy with nivolumab in metastatic sarcomas
Source: PubMed Central journal article supplement (PMC5200964; doi:10.1186/s13569-016-0064-0), 2016-12-30
Supplement: 13569_2016_64_MOESM1_ESM.pdf [file 13569_2016_64_MOESM1_ESM.pdf]

| Subtype | No. | Primary site (No.)                   | Concomitant Pazopanib |
|---------|-----|--------------------------------------|-----------------------|
| LMS     | 7   | uterus (4), vulva (2), RP (1)        | yes (4), no (3)       |
| OS      | 4   | pelvis (1), maxilla (2), humerus (1) | yes (3), no (1)       |
| UPS     | 3   | quadratus lumborum, UE (2)           | yes                   |
| SS      | 2   | UE, LE                               | yes                   |
| EpS     | 2   | neck, chest wall                     | yes (1), no (1)       |
| MC      | 1   | skull                                | no                    |
| DC      | 2   | buttock, LE                          | no                    |
| IS      | 1   | pulmonary artery                     | no                    |
| DFSP    | 1   | scalp                                | yes                   |
| MPNST   | 1   | lumbar spine                         | yes                   |
| LPS-DD  | 1   | RP                                   | yes                   |
| ASPS    | 1   | chest wall                           | yes                   |
| DSRCT   | 1   | adrenal                              | no                    |
| RMS     | 1   | diaphragm                            | no                    |

**Supplementary Table 1. Sarcoma subtypes.** Primary site and concomitant treatment with pazopanib given at 400-800mg po daily, are indicated.

DC= dedifferentiate chondrosarcoma; MC= mesenchymal chondrosarcoma; LPS-DD=dedifferentiated liposarcoma; LMS=leiomyosarcoma; ASPS=alveolar soft part sarcoma; SS=synovial sarcoma; EpS=epithelioid sarcoma; IS=intimal sarcoma; UPS=undifferentiated pleomorphic sarcoma; DFSP=dermatofibrosarcoma protuberans; OS=osteosarcoma; MPNST=malignant peripheral nerve sheet tumor; DSRCT=desmoplastic small round cell tumor; RP=retroperitoneum; UE=upper extremity; LE=lower extremity.

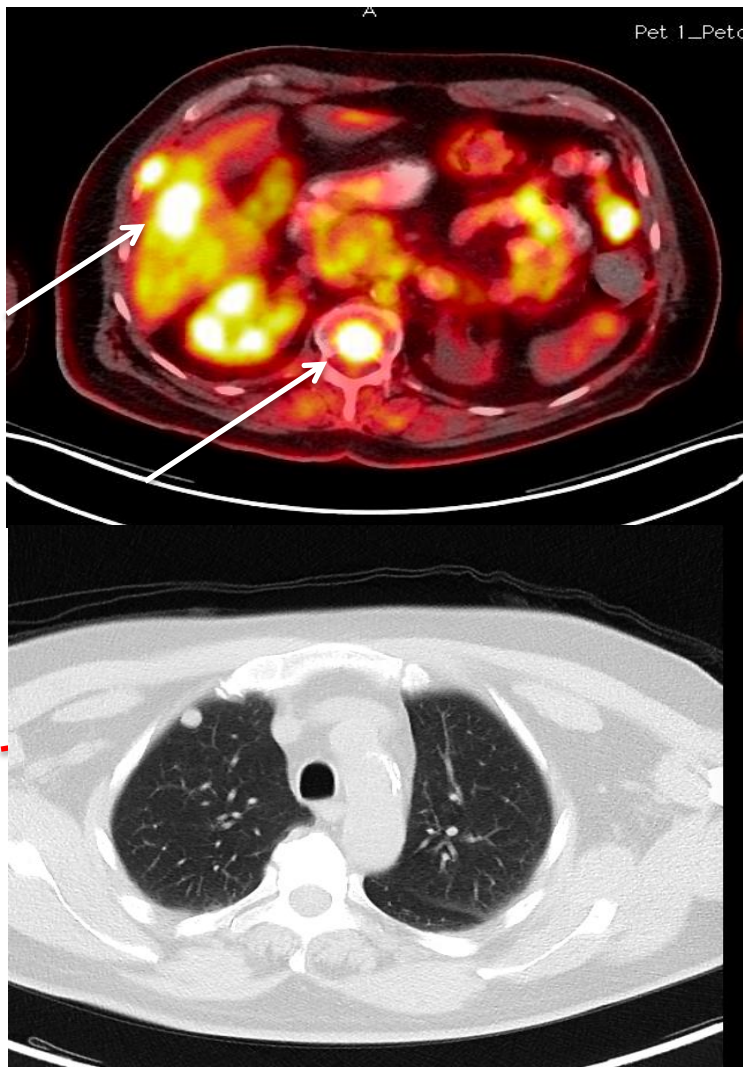

PRE-TREATMENT

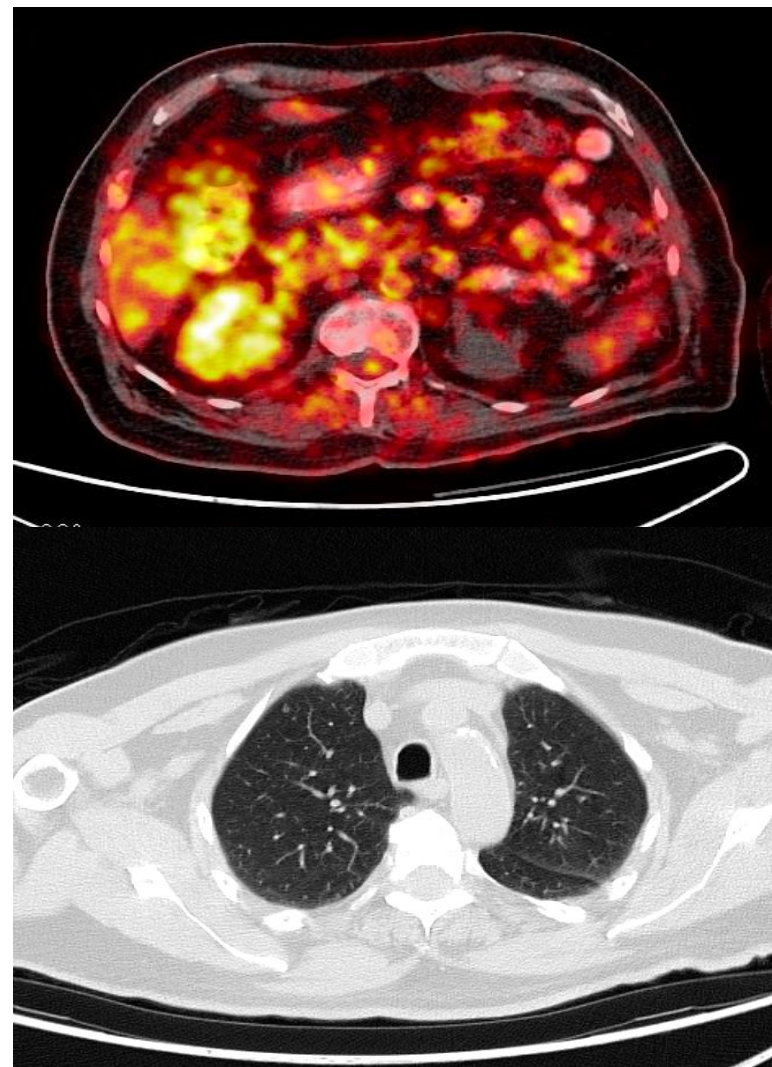

After 6 cycles

**Supplementary Figure 1. Partial response (PR) to nivolumab in a 74 year-old male with metastatic dedifferentiated chondrosarcoma.** This patient received 6 cycles of IV nivolumab 3mg/kg every 2 weeks; he is maintaining a PR after 26 cycles.
